# Supplementary material for: Biomimetic Nanosponges Enable the Detoxification of Vibrio vulnificus Hemolysin
Source: MDPI journal article supplement (doi:10.3390/ijms23126821), 2022-06-19
Supplement: s1 [file s1]

# **Biomimetic Nanosponges Enable the Detoxification of *Vibrio vulnificus* Hemolysin**

Shuaijun Zou,<sup>1,†</sup> Qianqian Wang,<sup>1,†</sup> Peipei Zhang,<sup>2,‡</sup> Bo Wang,<sup>1</sup> Guoyan Liu,<sup>1</sup> Fuhai Zhang,<sup>1</sup> Jie Li,<sup>1</sup> Fan Wang,<sup>1</sup> Beilei Wang,<sup>1,\*</sup> Liming Zhang<sup>1,\*</sup>

<sup>1</sup>Department of Marine Biomedicine and Polar Medicine, Naval Special Medical Center, Naval Medical University, Shanghai 200433, China

<sup>2</sup>Department of Marine Biological Injury and Dermatology, Naval Special Medical Center, Naval Medical University, Shanghai 200052, China

<sup>‡</sup> These authors contributed equally to this work

\* Corresponding Authors: lilly\_wang@126.com (B.W.); lmzhang@smmu.edu.cn (L.Z.).

## 1. Materials and Methods

### *Expression and purification of recombinant VvhA (rVvhA)*

The oligonucleotides were designed based on the genomic sequence of the *V. vulnificus* strain FJ03-X2 (GenBank KC821520) with the signal peptide sequence removed. The sequence was amplified by PCR (forward primer: 5'-CATATGCAAGAATATGTGCCGATTGTTGAG-3' and reverse primer: 5'-TCTAGACTAGAGTTTGACTTGTTGTAATGT-3') and then cloned into the His<sub>6</sub> tag expression vector pCZN1. After verification of the target sequence in the recombinant plasmids, the recombinant vectors were expressed in *Arctic-Express* (DE3) cells (Agilent Technologies). The bacteria were grown in LB-ampicillin medium at 37 °C until the cultures reached an OD<sub>600</sub> between 0.6 and 0.8. Then, the bacteria were induced with 0.5 mM isopropyl-β-dithiogalactopyranoside (IPTG) for 4 h. Next, the cultures were harvested, lysed and examined by sodium dodecyl sulfate-polyacrylamide gel electrophoresis (SDS-PAGE). A Ni-IDA-Sepharose Cl-6B affinity chromatography column (Sigma-Aldrich) was used for protein purification, and the protein was verified by Western blotting. The residual endotoxin in the purified rVvhA was measured using ToxinSensor<sup>TM</sup> Endotoxin Test Kit (GenScript, Nanjing, China). Finally, the activity of rVvhA was determined according to the hemolysis protocol in a 2% murine RBC suspension [1].

## 2. Results

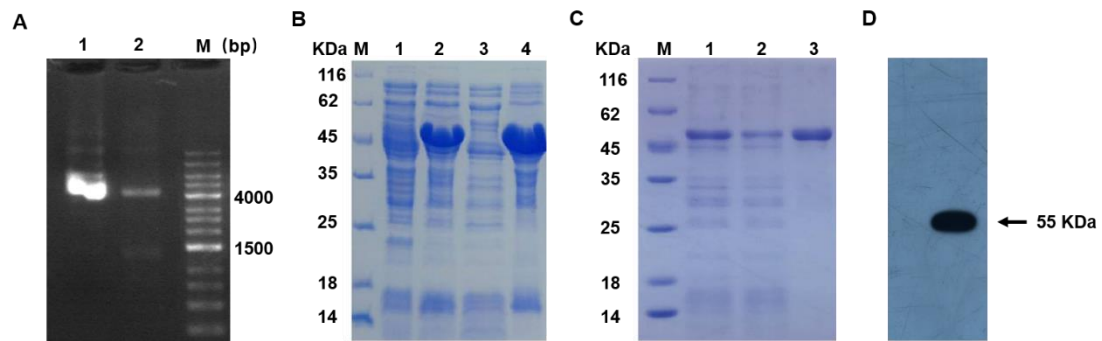

**Figure S1. Expression and purification of rVvhA.** (A) Determination of recombinant pCZN1 plasmids before and after enzyme digestion at *NdeI-XbaI* sites. (Line 1: plasmid before enzyme digestion, Line 2: plasmid after enzyme digestion, M: marker) (B) Determination of overexpression of rVvhA (M: marker, Line 1: sample from non-induced bacteria, Line 2: sample from IPTG-induced bacteria, Line 3: supernatant of lysed IPTG-induced bacteria, Line 4: sediment of lysed IPTG-induced bacteria). (C) SDS-PAGE analysis of rVvhA purification (M: marker, Line 1: sample harvested from lysed bacteria, Line 2: sample of outflow peak, Line 3: sample of elution peak). (D) Western-blot verification of purified rVvhA.

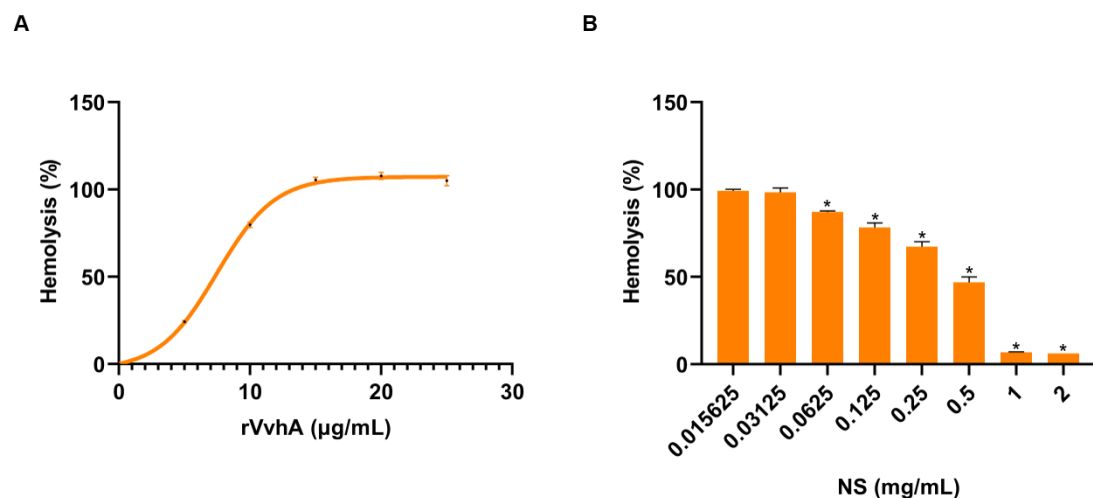

**Figure S2. Hemolytic activity of rVvhA and inhibition effect of NSs. (A)** Hemolytic activity of rVvhA on 2% RBC suspension *in vitro*. **(B)** Inhibition of NSs on rVvhA-caused hemolysis *in vitro*. (The data represent the means  $\pm$  SE. n = 3. \* $p$  < 0.05).

## References

1. Zohra M.; Fawzia A. Hemolytic activity of different herbal extracts used in Algeria. *Int. J. Pharm. Sci. Res.* **2014**, 5, 495-500.
